# Supplementary material for: Bogotá River anthropogenic contamination alters microbial communities and promotes spread of antibiotic resistance genes
Source: PubMed Central journal article supplement (PMC6692338; doi:10.1038/s41598-019-48200-6), 2019-08-13
Supplement: 41598_2019_48200_MOESM1_ESM.pdf [file 41598_2019_48200_MOESM1_ESM.pdf]

## Bogotá River anthropogenic contamination alters microbial communities and promotes spread of antibiotic resistance genes

Carlos Eduardo Posada-Perlaza<sup>a,b,c</sup>, Adán Ramírez-Rojas<sup>c</sup>, Paola Porras<sup>d</sup>, Boahemaa Adu-Oppong<sup>e</sup>, Ana-María Botero-Coy<sup>f</sup>, Félix Hernández<sup>f</sup>, Juan M. Anzola<sup>c</sup>, Lorena Díaz<sup>d</sup>, Gautam Dantas<sup>e,g,h,i</sup>, Alejandro Reyes<sup>a,b,e,#</sup>, María Mercedes Zambrano<sup>c,#</sup>

a) Computational Biology and Microbial Ecology Group, Department of Biological Sciences, Universidad de los Andes, Bogotá, D. C., Colombia; b) Max Planck Tandem Group in Computational Biology, Universidad de los Andes, Bogotá, D. C., Colombia; c) Molecular Genetics and Bioinformatics, Corporación CorpoGen, Bogotá, D. C., Colombia; d) Molecular Genetics and Antimicrobial Resistance Unit, International Center for Microbial Genomics, Universidad El Bosque, Bogotá, D. C., Colombia; e) Center for Genome Science and Systems Biology, Washington University School of Medicine, St. Louis, MO, USA; f) Research Institute for Pesticides and Water, University Jaume I, Castellón, Spain; g) Department of Pathology and Immunology, Washington University School of Medicine, St. Louis, MO, USA.; h) Department of Molecular Microbiology, Washington University School of Medicine, St. Louis, MO, USA; i) Department of Biomedical Engineering, Washington University, St. Louis, MO, USA.

#Corresponding authors: María M. Zambrano, [mzambrano@corpogen.org](mailto:mzambrano@corpogen.org), Corporación Corpogen, Carrera 5 #66A-34, Bogotá, Colombia; Alejandro Reyes, [a.reyes@uniandes.edu.co](mailto:a.reyes@uniandes.edu.co), Universidad de los Andes, Carrera 1 #18A-70, Bogotá, Colombia.

## Supplementary Methods

### Determination of pharmaceuticals

Duplicate samples were analyzed by UHPLC-MS/MS, using electrospray ionization, for the presence of antibiotics and other pharmaceutical compounds. Analysis was made by direct injection of the sample, adding the corresponding isotope-labeled internal standard (ILIS), when available, for matrix effects correction. In total, six ILIS were applied for antibiotics (sulfamethoxazole, trimethoprim, norfloxacin, ciprofloxacin, erythromycin, azithromycin) and five ILIS for other drugs (carbamazepine, venlafaxine, irbesartan, valsartan, diclofenac). Up to three MS/MS transitions were acquired, using the most sensitive for quantification (Q) and the other two for confirmation of the identity of the compound detected (q1, q2). The agreement in retention time and the compliance of at least one ion intensity ratio (q1/Q or q2/Q) between sample and reference standard was required for a reliable identification. Quality control samples (QCs) were prepared and analyzed together with the samples in every sample sequence to support the methodology applied. QCs consisted of samples from the Bogotá River's lower section (RL), which were fortified with the analytes under study at 0.1, 1.0 and 10 µg/L. A recovery range between 60 and 140% was considered as acceptable, as established in some guidelines for residue analysis (European Commission Directorate-General for Health and Food Safety, 2015). QCs showed that, in most cases, recoveries could not be estimated at the lowest level tested (0.1 µg/L). Therefore, medium or high fortification level (1.0 and 10 µg/L) recoveries were used. These were in the range 70-122% with the only exception of clarithromycin, which presented a mean recovery of 147%, surely due to the presence of this compound at concentrations above 1 µg/L in most of the samples (**Table 1**); this made the calculation of

recovery, by subtracting the concentration of the “blank” sample, troublesome. Although lower concentrations could be quantified for some compounds, the lowest level reported in this work was 0.01 µg/L, in order to reduce uncertainty in the quantification and in the identification process in this type of complex-matrix samples.

Upstream Hospital

a.

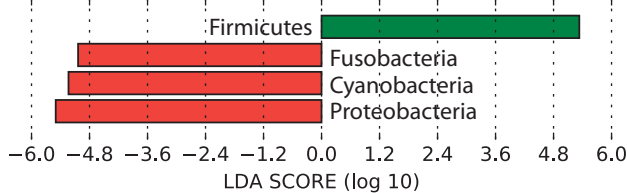

b.

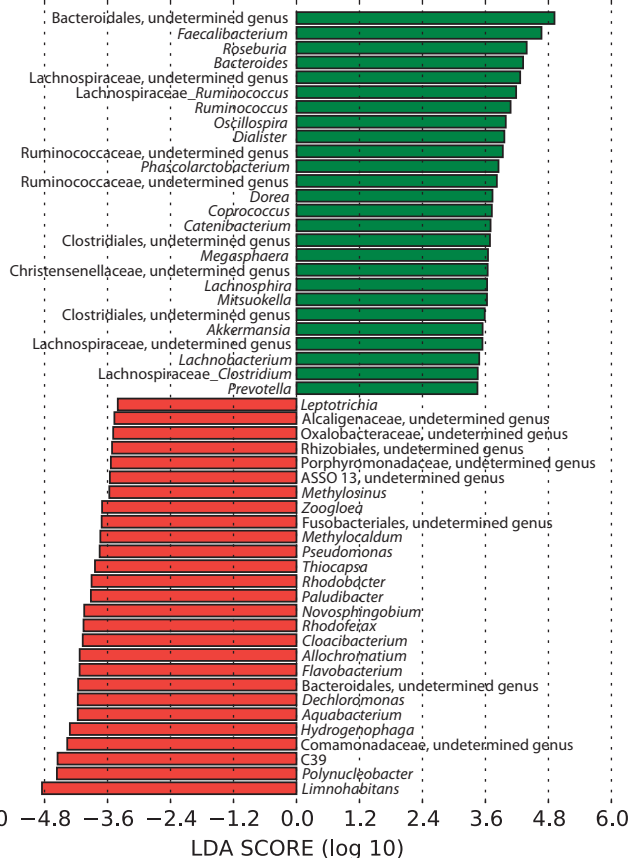

c.

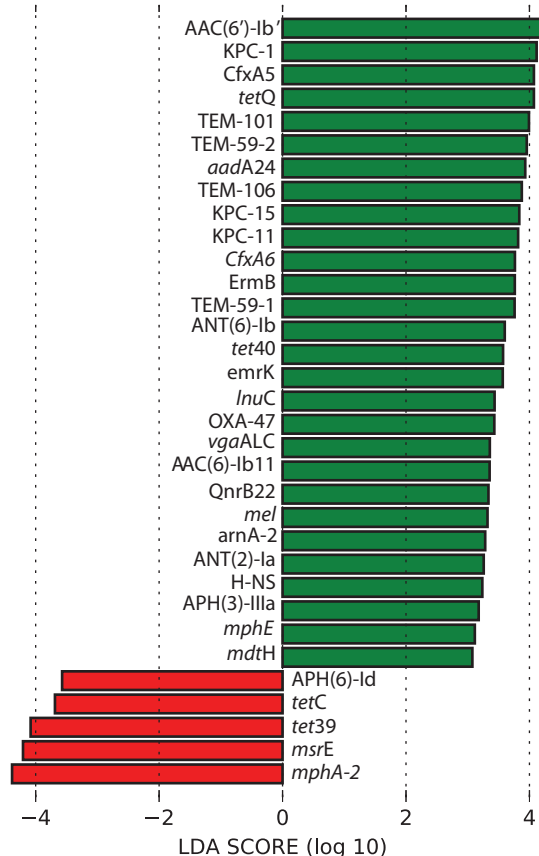

**Figure S1. Microbial taxa and ARGs enriched in hospitals and river upstream samples.** Linear discriminant analysis was used to identify both differentially enriched OTUs, based on 16S rRNA gene data (a, phylum, and b, genera), and ARGs (c). Upstream, grouped RS and RM samples; hospital, grouped hospital samples.

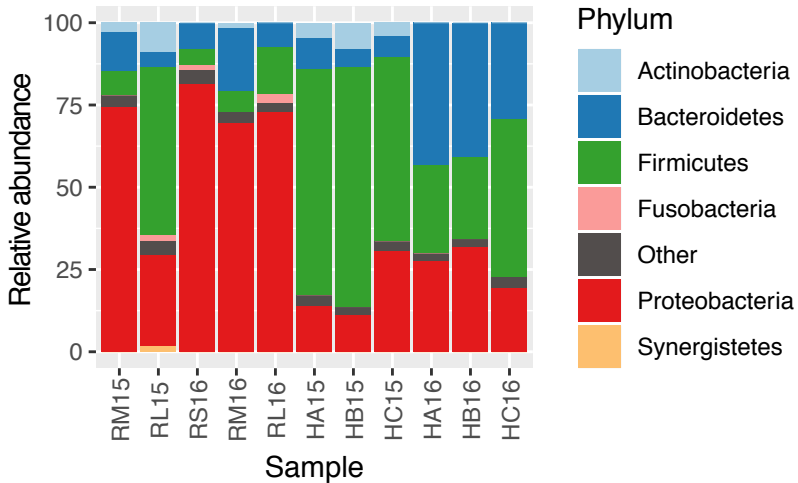

**Figure S2. Metaxa2 community profiles.** Taxonomic profiles determined with Metaxa2 coincide with those obtained with the analysis of 16S rRNA gene sequences (Fig. 2a).

# ARG Abundance (RPKM)

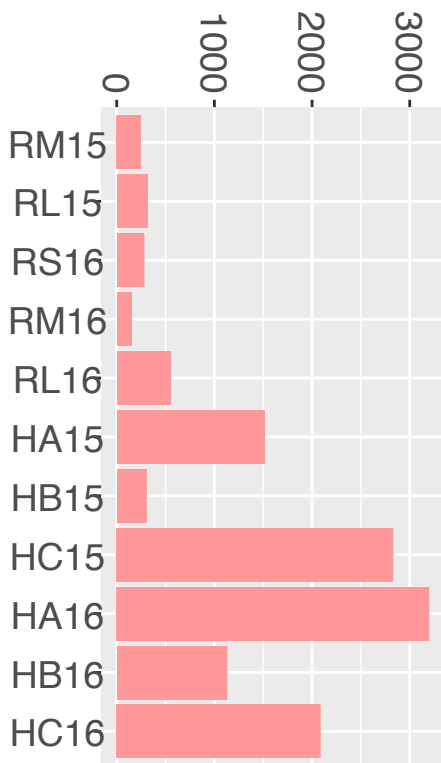



**Figure S3. Abundance of clinically relevant ARGs and genetic determinants.** Counts of clinically relevant ARGs and genetic determinants follow a similar pattern to general ARG counts (Fig. 4). The following were considered clinically relevant ARGs and genetic determinants: *AAC*, *aph*, *blaCTX-M*, *blaTEM*, *blaKPC*, *blaNDM-1*, *blaVIM*, *blaZ*, *cfr*, *CTX-M*, *defB*, *Erm*, *fmt*, *intI1*, *KPC*, *mecA*, *NDM*, *qnr*, *SHV*, *sul*, *TEM*, *tetM*, *vanA* and *VIM*.

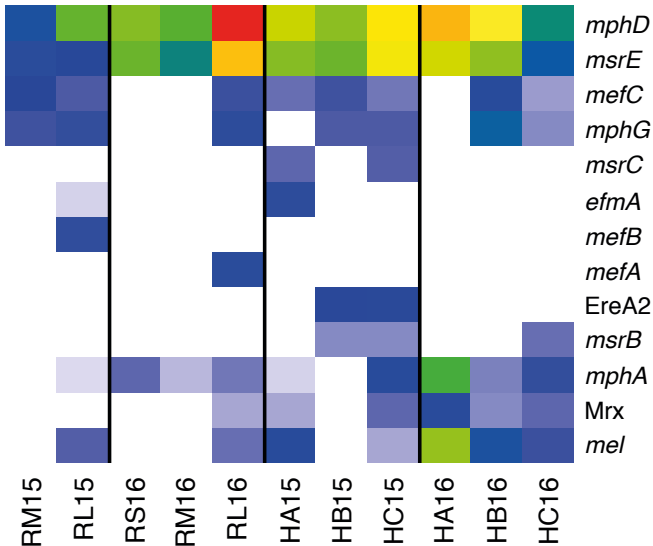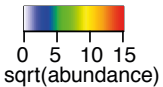

**Figure S4. Abundance of macrolide resistance genes.** Macrolide resistance is present in all samples, but genes differ among samples.

**Table S1**

Drug concentrations in water samples.

| Sample <sup>a</sup> | Drug concentration ( $\mu\text{g/L}$ ) <sup>b</sup> |      |       |      |       |      |      |
|---------------------|-----------------------------------------------------|------|-------|------|-------|------|------|
|                     | CBZ                                                 | VEN  | LOS   | IRB  | VAL   | NAP  | DIC  |
| RS15                | ND                                                  | ND   | ND    | ND   | ND    | ND   | ND   |
| RM15                | ND                                                  | ND   | ND    | 0.01 | 0.12  | 0.14 | 0.03 |
| RL15                | 0.04                                                | 0.01 | 3.24  | 0.08 | 0.62  | 0.67 | 0.32 |
| HA15-1              | ND                                                  | 0.02 | 4.65  | 0.17 | 0.04  | 0.12 | 0.14 |
| HA15-2              | ND                                                  | ND   | 3.33  | ND   | 0.83  | 0.38 | 0.19 |
| HB15-1              | 0.37                                                | ND   | 5.20  | ND   | ND    | 0.75 | 0.01 |
| HB15-2              | 0.13                                                | ND   | 4.59  | ND   | ND    | 0.35 | 0.09 |
| HC15-1              | 0.14                                                | 0.03 | 6.42  | 0.77 | 38.42 | 0.38 | ND   |
| HC15-2              | 0.04                                                | 0.06 | 12.42 | 0.41 | 2.39  | 0.67 | 3.41 |

<sup>a</sup> Samples are labeled as in Table 1. No measurements were performed on the third replicate from the different hospitals.

<sup>b</sup> Measurements based on UHPLC-MS/MS. CBZ, carbamazepine; VEN, venlafaxine; LOS, losartan; IRB, irbesartan; VAL, valsartan; NAP, naproxen; DIC, diclofenac. ND: Not detected.

**Table S2**

Linear discriminant analysis of bacterial phyla in hospital wastewaters and upstream river locations.

| <b>Phylum</b>   | <b>Category</b> | <b>Effect size</b> | <b><i>p</i> value</b> |
|-----------------|-----------------|--------------------|-----------------------|
| Actinobacteria  |                 |                    | -                     |
| Bacteroidetes   |                 |                    | -                     |
| Cyanobacteria   | Upstream        | 5.235159859        | 0.020136752           |
| Firmicutes      | Hospital        | 5.333049552        | 0.020136752           |
| Fusobacteria    | Upstream        | 5.036613241        | 0.020136752           |
| Proteobacteria  | Upstream        | 5.499567961        | 0.020136752           |
| Synergistetes   |                 |                    | -                     |
| Verrucomicrobia |                 |                    | -                     |

**Table S3**

Linear discriminant analysis of bacterial genera in hospital wastewaters and upstream river locations.

| <b>Genus</b>                       | <b>Category</b> | <b>Effect size</b> | <b>p value</b> |
|------------------------------------|-----------------|--------------------|----------------|
| <i>Acinetobacter</i>               |                 |                    | -              |
| Aeromonadaceae, u. g. <sup>1</sup> |                 |                    | -              |
| <i>Akkermansia</i>                 | Hospital        | 3.545583418        | 0.038867104    |
| Alcaligenaceae, u. g.              | Upstream        | 3.469430649        | 0.018102455    |
| <i>Allochromatium</i>              | Upstream        | 4.130821754        | 0.005761163    |
| <i>Aquabacterium</i>               | Upstream        | 4.167369558        | 0.020136752    |
| <i>Arcobacter</i>                  |                 |                    | -              |
| ASSO 13, u. g.                     | Upstream        | 3.555370551        | 0.020136752    |
| Bacteroidales, u. g.               | Upstream        | 4.159850902        | 0.020136752    |
| Bacteroidales, u. g.               | Hospital        | 4.915201262        | 0.020136752    |
| <i>Bacteroides</i>                 | Hospital        | 4.317245333        | 0.038867104    |
| <i>Bifidobacterium</i>             |                 |                    | -              |
| <i>Blautia</i>                     |                 |                    | -              |
| C39                                | Upstream        | 4.551910355        | 0.015219242    |
| <i>Catenibacterium</i>             | Hospital        | 3.697349043        | 0.020136752    |
| Christensenellaceae, u. g.         | Hospital        | 3.642192588        | 0.020136752    |
| <i>Cloacibacterium</i>             | Upstream        | 4.072543894        | 0.020136752    |
| Clostridiaceae_ <i>Clostridium</i> |                 |                    | -              |
| Clostridiales, u. g.               | Hospital        | 3.586484169        | 0.020136752    |
| Clostridiales, u. g.               | Hospital        | 3.685965035        | 0.020136752    |
| <i>Collinsella</i>                 |                 |                    | -              |
| Comamonadaceae, u. g.              | Upstream        | 4.367756338        | 0.020136752    |
| <i>Comamonas</i>                   |                 |                    | -              |
| <i>Coprococcus</i>                 | Hospital        | 3.721846755        | 0.020136752    |
| Coriobacteriaceae, u. g.           |                 |                    | -              |
| <i>Dechloromonas</i>               | Upstream        | 4.166762175        | 0.020136752    |
| <i>Desulfovibrio</i>               |                 |                    | -              |
| <i>Dialister</i>                   | Hospital        | 3.960248409        | 0.020136752    |
| <i>Dorea</i>                       | Hospital        | 3.733932183        | 0.020136752    |
| <i>Enterococcus</i>                |                 |                    | -              |
| Erysipelotrichaceae, u. g.         |                 |                    | -              |
| <i>Escherichia</i>                 |                 |                    | -              |
| <i>Eubacterium</i>                 |                 |                    | -              |
| <i>Faecalibacterium</i>            | Hospital        | 4.667492005        | 0.020136752    |
| <i>Flavobacterium</i>              | Upstream        | 4.132308723        | 0.020136752    |
| Fusobacteriales, u. g.             | Upstream        | 3.711860988        | 0.019620167    |

|                                           |          |             |             |
|-------------------------------------------|----------|-------------|-------------|
| <i>Hydrogenophaga</i>                     | Upstream | 4.317860841 | 0.018102455 |
| <i>Klebsiella</i>                         |          |             | -           |
| <i>Lachnobacterium</i>                    | Hospital | 3.481667302 | 0.020136752 |
| <i>Lachnospira</i>                        | Hospital | 3.631495287 | 0.020136752 |
| Lachnospiraceae_ <i>Clostridium</i>       | Hospital | 3.452820384 | 0.020136752 |
| Lachnospiraceae, u. g.                    | Hospital | 3.542836689 | 0.020136752 |
| Lachnospiraceae, u. g.                    | Hospital | 4.261758899 | 0.020136752 |
| Lactobacillales, u. g.                    |          |             | -           |
| <i>Lactobacillus</i>                      |          |             | -           |
| <i>Lactococcus</i>                        |          |             | -           |
| <i>Leptotrichia</i>                       | Upstream | 3.404820118 | 0.020136752 |
| <i>Limnohabitans</i>                      | Upstream | 4.84874854  | 0.020136752 |
| <i>Megamonas</i>                          |          |             | -           |
| <i>Megasphaera</i>                        | Hospital | 3.648427688 | 0.020136752 |
| <i>Methylocaldum</i>                      | Upstream | 3.737013854 | 0.005761163 |
| Methylophilaceae, u. g.                   |          |             | -           |
| <i>Methylosinus</i>                       | Upstream | 3.566029531 | 0.005761163 |
| <i>Microvirgula</i>                       |          |             | -           |
| <i>Mitsuokella</i>                        | Hospital | 3.629537147 | 0.020136752 |
| Mogibacteriaceae, u. g.                   |          |             | -           |
| Neisseriaceae, u. g.                      |          |             | -           |
| <i>Novosphingobium</i>                    | Upstream | 4.044293742 | 0.020136752 |
| <i>Oscillospira</i>                       | Hospital | 3.98698583  | 0.020136752 |
| Oxalobacteraceae, u. g.                   | Upstream | 3.492188062 | 0.015219242 |
| <i>Paludibacter</i>                       | Upstream | 3.917087515 | 0.018102455 |
| <i>Parabacteroides</i>                    |          |             | -           |
| Peptostreptococcaceae_ <i>Clostridium</i> |          |             | -           |
| Peptostreptococcaceae, u. g.              |          |             | -           |
| <i>Phascolarctobacterium</i>              | Hospital | 3.848577001 | 0.020136752 |
| <i>Polynucleobacter</i>                   | Upstream | 4.564570633 | 0.005761163 |
| Porphyromonadaceae, u. g.                 | Upstream | 3.536438981 | 0.020136752 |
| <i>Prevotella</i>                         | Hospital | 3.447691179 | 0.020136752 |
| <i>Pseudomonas</i>                        | Upstream | 3.749935098 | 0.020136752 |
| Rhizobiales, u. g.                        | Upstream | 3.513716144 | 0.020136752 |
| <i>Rhodobacter</i>                        | Upstream | 3.904064787 | 0.019620167 |
| <i>Rhodoferax</i>                         | Upstream | 4.057502904 | 0.020136752 |
| <i>Roseburia</i>                          | Hospital | 4.385648447 | 0.020136752 |
| Ruminococcaceae, u. g.                    | Hospital | 3.930954563 | 0.020136752 |
| Ruminococcaceae, u. g.                    | Hospital | 3.817230618 | 0.020136752 |
| <i>Ruminococcus</i>                       | Hospital | 4.078853046 | 0.020136752 |

|                        |          |             |             |
|------------------------|----------|-------------|-------------|
| Lachnospiraceae, u. g. | Hospital | 4.184708359 | 0.020136752 |
| <i>Selenomonas</i>     |          |             | -           |
| SMB53                  |          |             | -           |
| <i>Streptococcus</i>   |          |             | -           |
| <i>Succinivibrio</i>   |          |             | -           |
| <i>Sutterella</i>      |          |             | -           |
| <i>Thiocapsa</i>       | Upstream | 3.839333086 | 0.005761163 |
| <i>Tolumonas</i>       |          |             | -           |
| <i>vadinCA02</i>       |          |             | -           |
| Veillonellaceae, u. g. |          |             | -           |
| <i>Zoogloea</i>        | Upstream | 3.703766374 | 0.038055921 |

<sup>1</sup> u. g.: undetermined genus



**Table S4**

Classification of 16S gene copies identified by Metaxa2 in the metagenomic reads.

| <b>Sample<sup>a</sup></b> | <b>Archaea (%)</b> | <b>Bacteria (%)</b> | <b>Eukaryota (%)</b> | <b>Uncertain (%)</b> |
|---------------------------|--------------------|---------------------|----------------------|----------------------|
| RS16                      | 0.27               | 80.70               | 12.01                | 7.02                 |
| RM15                      | 0.32               | 85.88               | 8.20                 | 5.60                 |
| RM16                      | 0.20               | 87.68               | 6.51                 | 5.61                 |
| RL15                      | 1.80               | 96.21               | 0.39                 | 1.59                 |
| RL16                      | 0.26               | 98.19               | 0.38                 | 1.16                 |
| HA15                      | 0.03               | 98.06               | 0.19                 | 1.72                 |
| HA16                      | 0.00               | 98.43               | 0.24                 | 1.32                 |
| HB15                      | 0.04               | 97.99               | 0.06                 | 1.91                 |
| HB16                      | 0.00               | 98.18               | 0.29                 | 1.52                 |
| HC15                      | 0.04               | 98.44               | 0.08                 | 1.45                 |
| HC16                      | 0.04               | 98.89               | 0.08                 | 0.99                 |

<sup>a</sup> Sample names as described in Table 1.

**Table S5**

Linear discriminant analysis of antibiotic resistances in hospital wastewaters and upstream river locations.

| <b>Antibiotic</b>              | <b>Category</b> | <b>Effect size</b> | <b><i>p</i> value</b> |
|--------------------------------|-----------------|--------------------|-----------------------|
| Aminocoumarin                  |                 |                    | -                     |
| Aminoglycoside                 |                 |                    | -                     |
| Aminoglycoside_Fluoroquinolone |                 |                    | -                     |
| Bacitracin                     |                 |                    | -                     |
| Beta_lactam                    |                 |                    | -                     |
| Chloramphenicol                |                 |                    | -                     |
| Fluoroquinolone                |                 |                    | -                     |
| Fosfomicin                     |                 |                    | -                     |
| Glycopeptide                   |                 |                    | -                     |
| Lincosamide                    | Hospital        | 3.732079866        | 0.043114447           |
| Lincosamide_Streptogramin      |                 |                    | -                     |
| Macrolide                      | Upstream        | 4.505365933        | 0.020136752           |
| Macrolide_Fluoroquinolone      |                 |                    | -                     |
| Macrolide_Streptogramin        |                 |                    | -                     |
| MicrocinJ25                    |                 |                    | -                     |
| MLS                            |                 |                    | -                     |
| Multiple                       |                 |                    | -                     |
| Mupirocin                      |                 |                    | -                     |
| Polymyxin                      | Hospital        | 3,671296553        | 0.043114447           |
| Rifampicin                     | Hospital        | 3.608713849        | 0.043114447           |
| Rifampicin_Isoniazid           |                 |                    | -                     |
| Streptogramin                  | Hospital        | 3.793757722        | 0.043114447           |
| Streptothricin                 |                 |                    | -                     |
| Sulfonamide                    |                 |                    | -                     |
| Tetracycline                   |                 |                    | -                     |
| Trimethoprim                   |                 |                    | -                     |

**Table S6**

Linear discriminant analysis of ARGs in hospital wastewaters and upstream river locations.

| <b>ARG</b>          | <b>Category</b> | <b>Effect size</b> | <b><i>p</i> value</b> |
|---------------------|-----------------|--------------------|-----------------------|
| AAC(3)-Ia           |                 |                    | -                     |
| AAC(3)-IIa          |                 |                    | -                     |
| AAC(3)-VIIa         |                 |                    | -                     |
| AAC(6)-30/AAC(6)-Ib |                 |                    | -                     |
| AAC(6)-Ib           |                 |                    | -                     |
| AAC(6)-Ib-cr        |                 |                    | -                     |
| AAC(6)-Ib'          | Hospital        | 4.213581113        | 0.018102455           |
| AAC(6)-Ib11         | Hospital        | 3.354489843        | 0.043114447           |
| AAC(6)-Ib3          |                 |                    | -                     |
| AAC(6)-Ii           |                 |                    | -                     |
| AAC(6)-IIa          |                 |                    | -                     |
| aad(6)              |                 |                    | -                     |
| aadA11              |                 |                    | -                     |
| aadA12              |                 |                    | -                     |
| aadA16              |                 |                    | -                     |
| aadA2               |                 |                    | -                     |
| aadA21              |                 |                    | -                     |
| aadA23              |                 |                    | -                     |
| aadA24              | Hospital        | 3.931813751        | 0.018102455           |
| aadA25              |                 |                    | -                     |
| aadA5               |                 |                    | -                     |
| aadA8               |                 |                    | -                     |
| acrA                |                 |                    | -                     |
| acrD                |                 |                    | -                     |
| acrE                |                 |                    | -                     |
| acrF                |                 |                    | -                     |
| acrS                |                 |                    | -                     |
| aminocoumarin1      |                 |                    | -                     |
| aminocoumarin2      |                 |                    | -                     |
| amrA                |                 |                    | -                     |
| ANT(2)-Ia           | Hospital        | 3.259032123        | 0.043114447           |
| ANT(6)-Ia           |                 |                    | -                     |
| ANT(6)-Ib           | Hospital        | 3.599819859        | 0.018102455           |
| ANT(9)-Ia           |                 |                    | -                     |
| APH(2)-IIa          |                 |                    | -                     |
| APH(2)-IVa          |                 |                    | -                     |

|                |          |             |             |
|----------------|----------|-------------|-------------|
| APH(3)-Ia      |          |             | -           |
| APH(3)-Ib      |          |             | -           |
| APH(3)-IIa     |          |             | -           |
| APH(3)-IIIa    | Hospital | 3.177372808 | 0.043114447 |
| APH(3)-VI      |          |             | -           |
| APH(6)-Id      | Upstream | 3.571471398 | 0.038867104 |
| arr-2          |          |             | -           |
| arr-8          |          |             | -           |
| arnA           | Hospital | 3.283044964 | 0.043114447 |
| bacA           |          |             | -           |
| baeR           |          |             | -           |
| baeS           |          |             | -           |
| Bifidobacteria |          |             | -           |
| BlaB           |          |             | -           |
| bleomycin      |          |             | -           |
| catB2          |          |             | -           |
| catB3          |          |             | -           |
| catB8          |          |             | -           |
| catQ           |          |             | -           |
| catS           |          |             | -           |
| CblA-1         |          |             | -           |
| CcrA           |          |             | -           |
| CFE-1          |          |             | -           |
| CfxA           |          |             | -           |
| CfxA2          |          |             | -           |
| CfxA5          | Hospital | 4.072160589 | 0.018102455 |
| CfxA6          | Hospital | 3.764412422 | 0.018102455 |
| CMY-12         |          |             | -           |
| CMY-17         |          |             | -           |
| CMY-73         |          |             | -           |
| cphA5          |          |             | -           |
| cpxA           |          |             | -           |
| cpxR           |          |             | -           |
| CRP            |          |             | -           |
| CTX-M-101      |          |             | -           |
| CTX-M-107      |          |             | -           |
| CTX-M-11       |          |             | -           |
| CTX-M-117      |          |             | -           |
| CTX-M-12       |          |             | -           |
| CTX-M-72       |          |             | -           |

|              |                                  |
|--------------|----------------------------------|
| CTX-M-9      | -                                |
| dfrA12       | -                                |
| dfrA14       | -                                |
| dfrA15       | -                                |
| dfrA17       | -                                |
| dfrA19       | -                                |
| dfrA21       | -                                |
| dfrA8        | -                                |
| dfrF         | -                                |
| dfrG         | -                                |
| efmA         | -                                |
| efpA         | -                                |
| emrA         | -                                |
| emrB         | -                                |
| emrD         | -                                |
| emrK         | Hospital 3.567456028 0.043114447 |
| emrR         | -                                |
| emrY         | -                                |
| Enterobacter | -                                |
| EreA2        | -                                |
| Erm(33)      | -                                |
| ErmB         | Hospital 3.762504796 0.018102455 |
| ErmF         | -                                |
| ErmG-1       | -                                |
| ErmG-2       | -                                |
| ErmT         | -                                |
| Escherichia1 | -                                |
| Escherichia2 | -                                |
| evgA         | -                                |
| evgS         | -                                |
| floR         | -                                |
| FosA3        | -                                |
| FosA5        | -                                |
| FOX-8        | -                                |
| gadE         | -                                |
| gadW         | -                                |
| gadX         | -                                |
| GES-1        | -                                |
| GES-10       | -                                |
| GES-21       | -                                |

|            |          |             |             |
|------------|----------|-------------|-------------|
| GES-8      |          |             | -           |
| H-NS       | Hospital | 3.236558255 | 0.043114447 |
| IMP-18     |          |             | -           |
| kdpE       |          |             | -           |
| Klebsiella |          |             | -           |
| KPC-1      | Hospital | 4.1163439   | 0.043114447 |
| KPC-11     | Hospital | 3.816688983 | 0.043114447 |
| KPC-13     |          |             | -           |
| KPC-15     | Hospital | 3,835313675 | 0.043114447 |
| KPC-22     |          |             | -           |
| KPC-8      |          |             | -           |
| KPC-9      |          |             | -           |
| LEN-13     |          |             | -           |
| leuO       |          |             | -           |
| lnuB       |          |             | -           |
| lnuC       | Hospital | 3.435178947 | 0.043114447 |
| lnuF       |          |             | -           |
| lsaA       |          |             | -           |
| lsaC       |          |             | -           |
| lsaE       |          |             | -           |
| marA       |          |             | -           |
| mdtA       |          |             | -           |
| mdtB       |          |             | -           |
| mdtC       |          |             | -           |
| mdtD       |          |             | -           |
| mdtE       |          |             | -           |
| mdtF       |          |             | -           |
| mdtG       |          |             | -           |
| mdtH       | Hospital | 3.075169582 | 0.043114447 |
| mdtL       |          |             | -           |
| mdtM       |          |             | -           |
| mdtN       |          |             | -           |
| mdtO       |          |             | -           |
| mdtP       |          |             | -           |
| mecR1      |          |             | -           |
| mefA       |          |             | -           |
| mefB       |          |             | -           |
| mefC       |          |             | -           |
| mel        | Hospital | 3.320631113 | 0.043114447 |
| mfd        |          |             | -           |

|          |          |             |             |
|----------|----------|-------------|-------------|
| MOX-6    |          |             | -           |
| MOX-8    |          |             | -           |
| mphA     |          |             | -           |
| mphD     | Upstream | 4.382352889 | 0.020136752 |
| mphG     |          |             | -           |
| Mrx      | Hospital | 3.114806755 | 0.043114447 |
| msbA     |          |             | -           |
| msrB     |          |             | -           |
| msrC     |          |             | -           |
| msrE     | Upstream | 4.205195758 | 0.038867104 |
| NDM-10   |          |             | -           |
| NDM-12   |          |             | -           |
| NDM-9    |          |             | -           |
| NPS      |          |             | -           |
| oqxA     |          |             | -           |
| OXA-119  |          |             | -           |
| OXA-129  |          |             | -           |
| OXA-14   |          |             | -           |
| OXA-15   |          |             | -           |
| OXA-164  |          |             | -           |
| OXA-17   |          |             | -           |
| OXA-170  |          |             | -           |
| OXA-183  |          |             | -           |
| OXA-2    |          |             | -           |
| OXA-210  |          |             | -           |
| OXA-233  |          |             | -           |
| OXA-239  |          |             | -           |
| OXA-25   |          |             | -           |
| OXA-253  |          |             | -           |
| OXA-27   |          |             | -           |
| OXA-31   |          |             | -           |
| OXA-333  |          |             | -           |
| OXA-334  |          |             | -           |
| OXA-34   |          |             | -           |
| OXA-36   |          |             | -           |
| OXA-36-2 |          |             | -           |
| OXA-361  |          |             | -           |
| OXA-368  |          |             | -           |
| OXA-370  |          |             | -           |
| OXA-398  |          |             | -           |

|         |          |             |             |
|---------|----------|-------------|-------------|
| OXA-415 |          |             | -           |
| OXA-420 |          |             | -           |
| OXA-422 |          |             | -           |
| OXA-454 |          |             | -           |
| OXA-46  |          |             | -           |
| OXA-47  | Hospital | 3.43089979  | 0.043114447 |
| OXA-49  |          |             | -           |
| OXA-53  |          |             | -           |
| OXA-56  |          |             | -           |
| OXA-9   |          |             | -           |
| OXA-96  |          |             | -           |
| patA    |          |             | -           |
| PC1     |          |             | -           |
| PER-3   |          |             | -           |
| plasmid |          |             | -           |
| PmrC    |          |             | -           |
| PmrE    |          |             | -           |
| qacH    |          |             | -           |
| QnrB21  |          |             | -           |
| QnrB22  | Hospital | 3.335935363 | 0.043114447 |
| QnrB3   |          |             | -           |
| QnrB30  |          |             | -           |
| QnrB4   |          |             | -           |
| QnrB40  |          |             | -           |
| QnrB50  |          |             | -           |
| QnrB66  |          |             | -           |
| QnrB71  |          |             | -           |
| QnrB72  |          |             | -           |
| QnrD1   |          |             | -           |
| QnrS2   |          |             | -           |
| QnrS8   |          |             | -           |
| QnrS9   |          |             | -           |
| QnrVC1  |          |             | -           |
| sat-1   |          |             | -           |
| sat-4   |          |             | -           |
| SHV-115 |          |             | -           |
| SHV-135 |          |             | -           |
| SHV-159 |          |             | -           |
| SHV-167 |          |             | -           |
| SHV-29  |          |             | -           |



|           |          |             |             |   |
|-----------|----------|-------------|-------------|---|
| SHV-34    |          |             |             | - |
| sul1      |          |             |             | - |
| sul2      |          |             |             | - |
| sul3      |          |             |             | - |
| TEM-10    |          |             |             | - |
| TEM-101   | Hospital | 3.992049989 | 0.043114447 |   |
| TEM-102   |          |             |             | - |
| TEM-103   |          |             |             | - |
| TEM-106   | Hospital | 3.876092602 | 0.043114447 |   |
| TEM-108-1 |          |             |             | - |
| TEM-108-2 |          |             |             | - |
| TEM-112   |          |             |             | - |
| TEM-113   |          |             |             | - |
| TEM-123   |          |             |             | - |
| TEM-125-1 |          |             |             | - |
| TEM-125-2 |          |             |             | - |
| TEM-127   |          |             |             | - |
| TEM-135   |          |             |             | - |
| TEM-138   |          |             |             | - |
| TEM-145   |          |             |             | - |
| TEM-146   |          |             |             | - |
| TEM-148   |          |             |             | - |
| TEM-149-1 |          |             |             | - |
| TEM-149-2 |          |             |             | - |
| TEM-150   |          |             |             | - |
| TEM-156   |          |             |             | - |
| TEM-159   |          |             |             | - |
| TEM-164   |          |             |             | - |
| TEM-166   |          |             |             | - |
| TEM-172   |          |             |             | - |
| TEM-174   |          |             |             | - |
| TEM-178   |          |             |             | - |
| TEM-182   |          |             |             | - |
| TEM-185   |          |             |             | - |
| TEM-189   |          |             |             | - |
| TEM-192   |          |             |             | - |
| TEM-196   |          |             |             | - |
| TEM-208-1 |          |             |             | - |
| TEM-208-2 |          |             |             | - |
| TEM-22    |          |             |             | - |

|          |          |             |             |
|----------|----------|-------------|-------------|
| TEM-54-1 |          |             | -           |
| TEM-54-2 |          |             | -           |
| TEM-55-1 |          |             | -           |
| TEM-55-2 |          |             | -           |
| TEM-57-1 |          |             | -           |
| TEM-57-2 |          |             | -           |
| TEM-59-1 | Hospital | 3.759509149 | 0.043114447 |
| TEM-59-2 | Hospital | 3.956521022 | 0.043114447 |
| TEM-89   |          |             | -           |
| TEM-95   |          |             | -           |
| tet31    |          |             | -           |
| tet32    |          |             | -           |
| tet39    | Upstream | 4,081712902 | 0.020136752 |
| tet40    | Hospital | 3.572407771 | 0.043114447 |
| tet44    |          |             | -           |
| tetA(P)  |          |             | -           |
| tetB     |          |             | -           |
| tetC     | Upstream | 3.687651667 | 0.020136752 |
| tetD     |          |             | -           |
| tetE     |          |             | -           |
| tetL     |          |             | -           |
| tetM     |          |             | -           |
| tetO     |          |             | -           |
| tetQ     | Hospital | 4.072056258 | 0.018102455 |
| tetS     |          |             | -           |
| tetT     |          |             | -           |
| tetW     |          |             | -           |
| tetX     |          |             | -           |
| tolC     |          |             | -           |
| vanA     |          |             | -           |
| vanHA    |          |             | -           |
| vanSA    |          |             | -           |
| vanSB    |          |             | -           |
| vanXA    |          |             | -           |
| vatE     |          |             | -           |
| VEB-9    |          |             | -           |
| vgaC     | Hospital | 3.357706818 | 0.043114447 |
| VIM-23   |          |             | -           |
| YojI     |          |             | -           |
